# Supplementary material
Source: Springer Nature journal article supplement (https://www.springermedizin.de/resource/supplementary/12943_2010_689_MOESM3_ESM.pdf/9554588)

### Androgen dependent

### Androgen independent

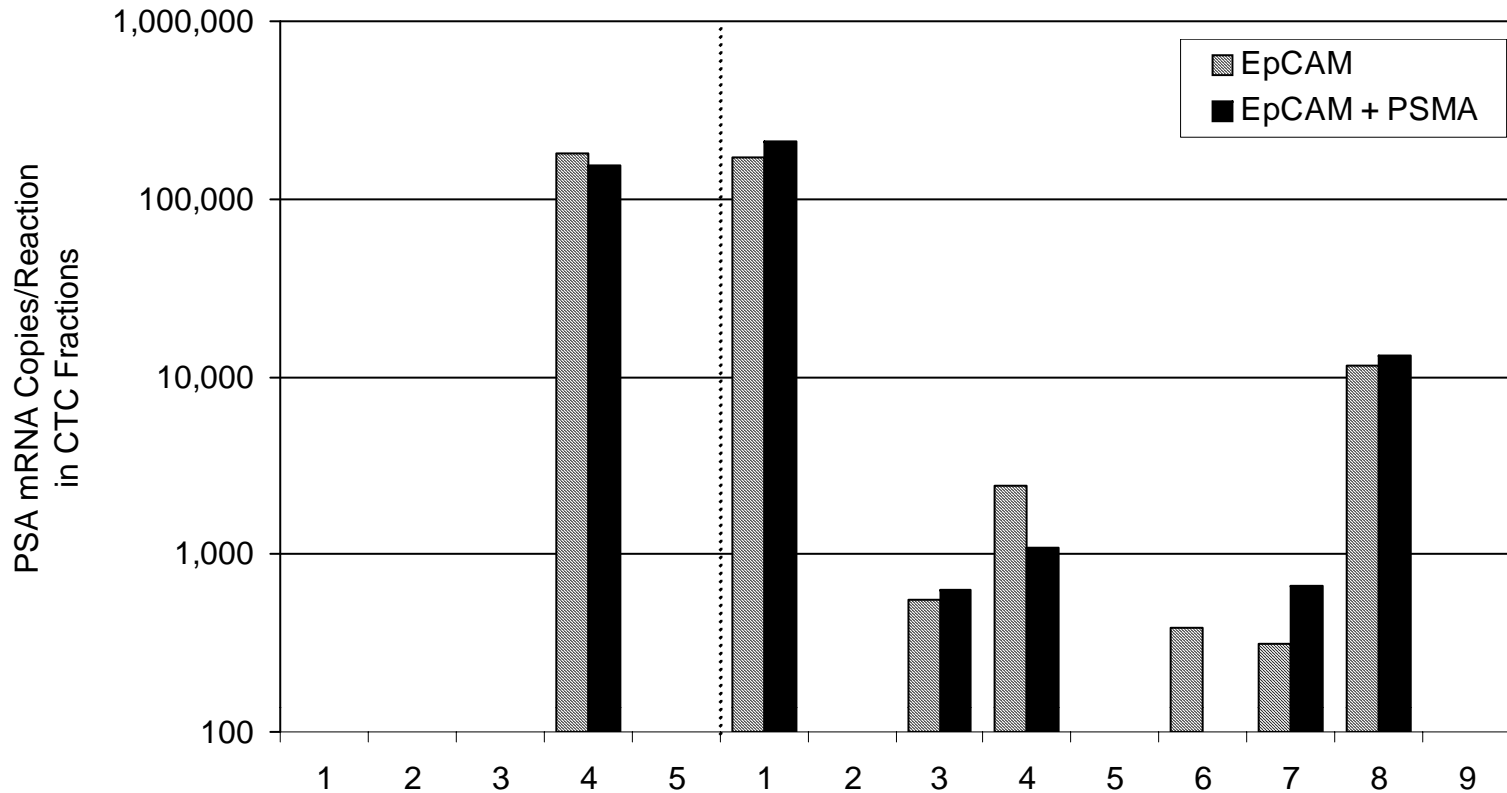

Supplement: MOESM3 [file 9554588]
